# Supplementary material
Source: PubMed Central journal article supplement (PMC5503176)
Supplement: cm7b00848_si_001.pdf [file cm7b00848_si_001.pdf]

# Supporting Information

## Ga for Zn Cation Exchange Allows for Highly Luminescent and Photostable InZnP based Quantum Dots

*Francesca Pietra<sup>a,‡</sup>, Nicholas Kirkwood<sup>a,‡</sup>, Luca De Trizio<sup>b</sup>, Anne W. Hoekstra<sup>a</sup>, Lennart Kleibergen<sup>a</sup>, Nicolas Renaud<sup>a</sup>, Rolf Koole<sup>d</sup>, Patrick Baesjou<sup>d,e</sup>, Liberato Manna<sup>b,c</sup>, Arjan J. Houtepen<sup>a,\*</sup>*

<sup>a</sup>Opto-Electronic Materials Section, Faculty of Applied Sciences, Delft University of Technology, Julianalaan 136, 2628 BL Delft, The Netherlands

<sup>b</sup>Department of Nanochemistry, Istituto Italiano di Tecnologia (IIT), via Morego, 30, 16163 Genova, Italy

<sup>c</sup>Kavli Institute of Nanoscience, Delft University of Technology, Lorentzweg 1 2628 CJ Delft, The Netherlands

<sup>d</sup>Philips Lighting, High Tech Campus 44, 5656 AE Eindhoven, The Netherlands

<sup>e</sup>Soft Condensed Matter, Debye Institute, Utrecht University, Princetonplein 5, 3584 CC Utrecht, The Netherlands

<sup>‡</sup>These authors contributed equally

## Growth of larger InZnP core QDs.

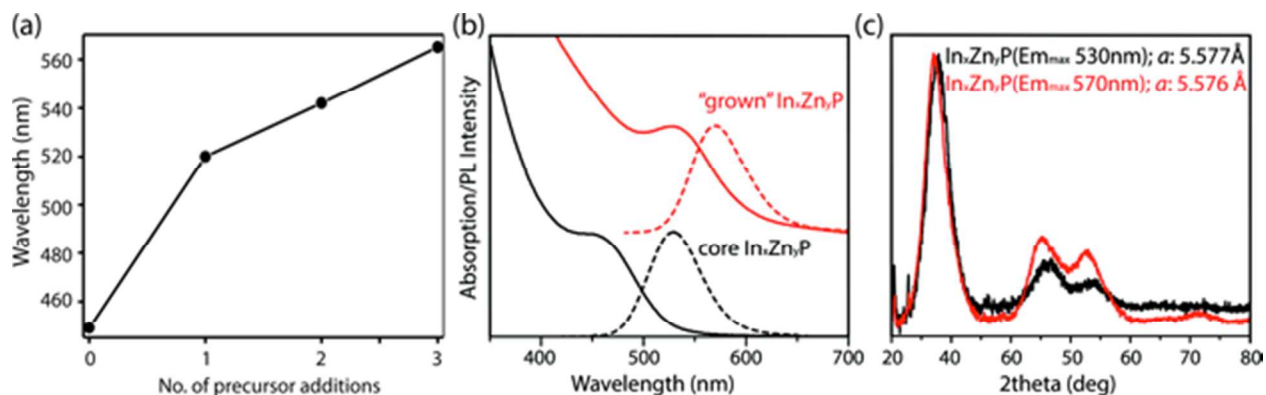

**Figure S1.** (a) Dependence of 1S absorbance wavelength on the number of In/Zn palmitate and  $P(\text{TMS})_3$  precursor additions. (b) Absorption and PL emission spectra of  $\text{In}_x\text{Zn}_y\text{P}$  before and after further growth of the core by multiple injection of In-Zn and P precursor. For a  $\text{Zn}/\text{In} = 1.5$  ratio added in the synthesis, the  $\text{Zn}/\text{In}$  ratio measured with ICP was 0.68 in the small core, and slightly increased to 0.81 after further growth. (c) XRD pattern of  $\text{In}_x\text{Zn}_y\text{P}$  before (black pattern) and after (red pattern) the further growth. The lattice constant of the two samples was roughly constant:  $5.577 \text{ \AA}$  for  $\text{In}_x\text{Zn}_y\text{P}$  before the growth and  $5.576 \text{ \AA}$  for  $\text{In}_x\text{Zn}_y\text{P}$  after the growth. Upon growth the cores retain roughly the same  $\text{Zn}/\text{In}$  content and the same lattice constant.

## TEM on InP (Zn/In = 0) before and after Ga CE reaction.

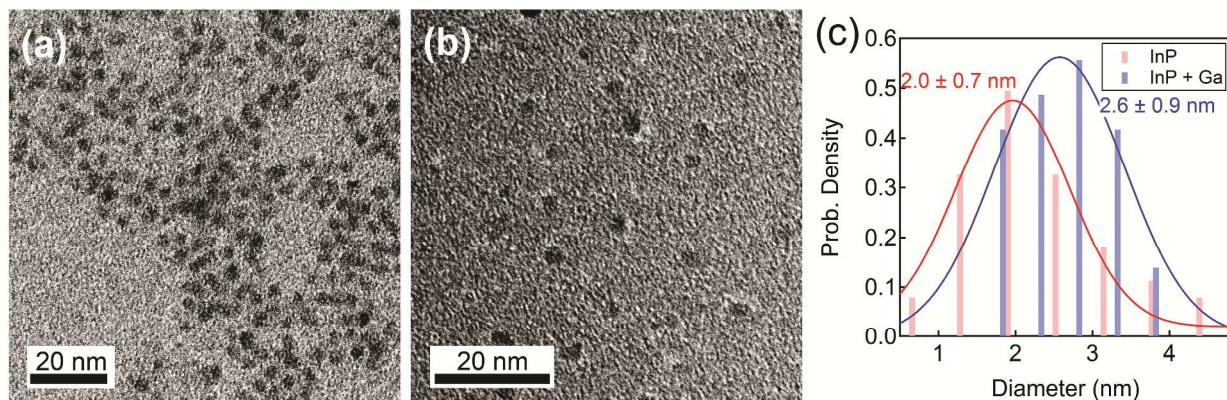

**Figure S2.** TEM images of InP QDs cores (Zn/In = 0) before (a) and after (b) the addition of 0.12 mmol Ga(OA)<sub>3</sub>. Scale bar is 20 nm. (c) Histogram of QD diameters obtained from TEM images. The average particle size, determined from fits to the histograms, increased from  $2.0 \pm 0.7$  in case of InP cores to  $2.6 \pm 0.9$  after the addition of 0.12 mmol of Ga(OA)<sub>3</sub>.

### Extended data and controls for Ga CE reaction.

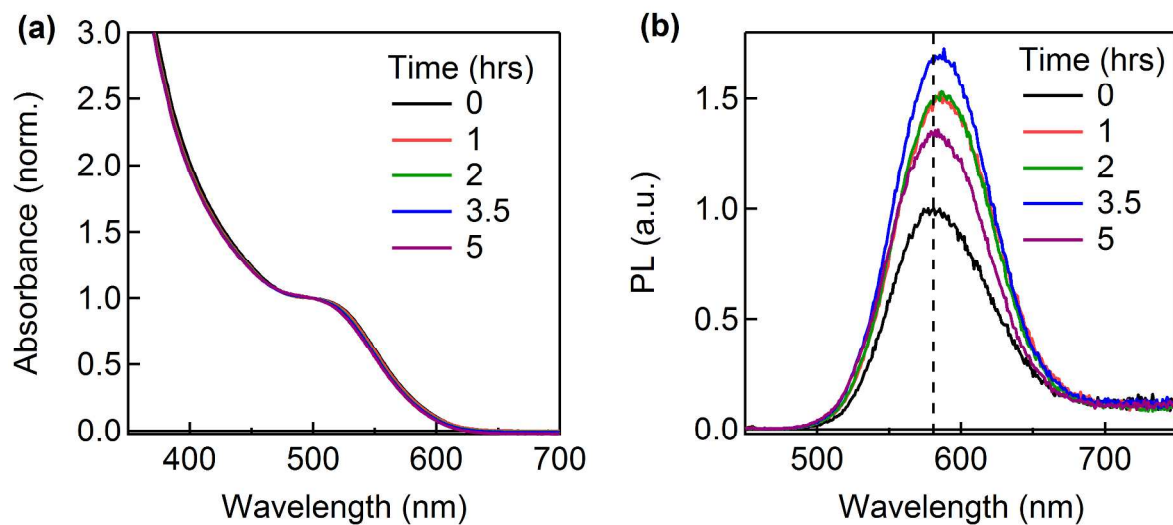

**Figure S3.** Effect of heating (200°C, 0-5 hours) on InZnP QDs (Zn/In = 1.0). **(a)** Absorbance spectra normalized to first exciton feature. The peak becomes more shoulder-like over time but otherwise there is little change. **(b)** PL spectra normalized to fraction of light absorbed at excitation wavelength (400 nm). The PL increases to 170% of its initial value over 3.5 hours but after this it decreases to 133% of the initial value.

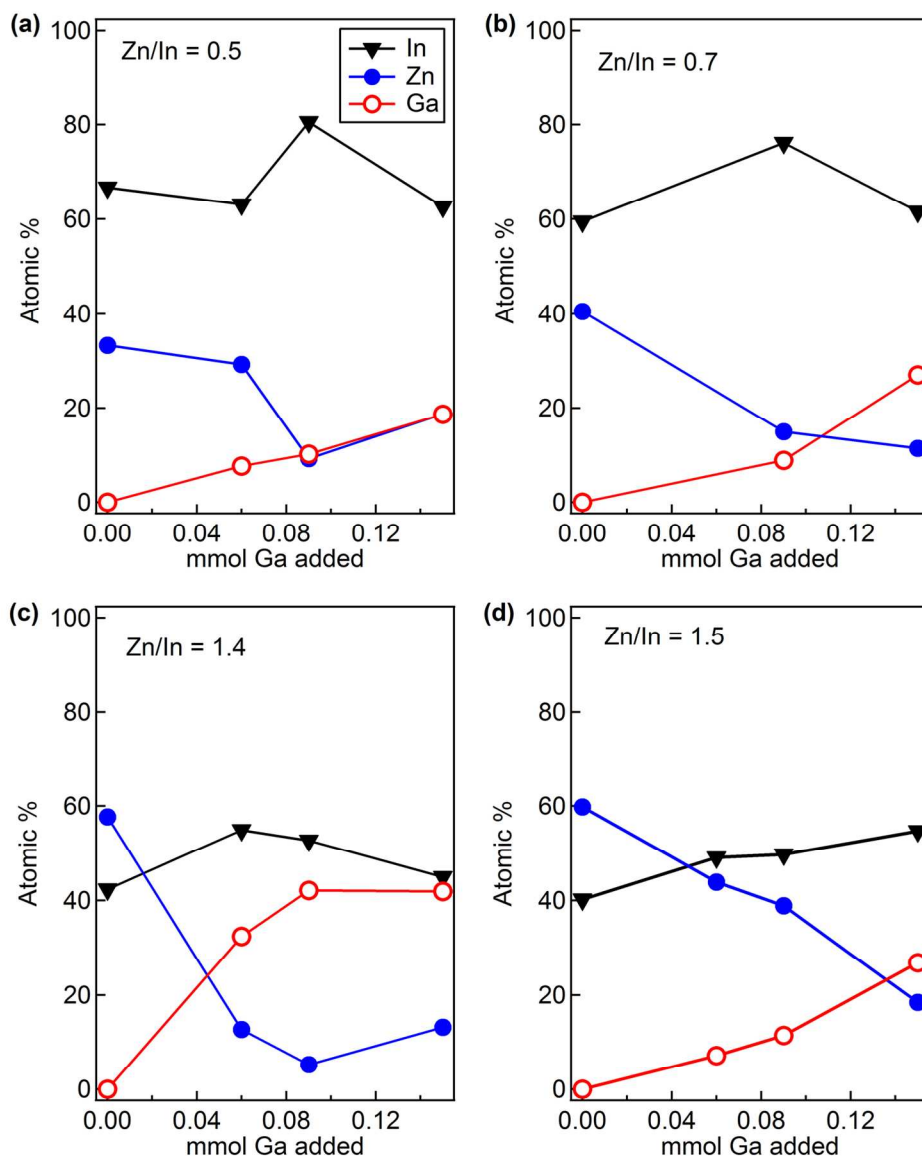

**Figure S4.** Data for additional reactions performed to reproduce the results of Figure 3 in the main paper. The composition of InZnP QDs is plotted as a function of added Ga(OA)<sub>3</sub>, calculated from ICP measurements on reaction aliquots. **(a)** Zn/In = 0.5, **(b)** Zn/In = 0.7, **(c)** Zn/In = 1.4 and **(d)** Zn/In = 1.5. The data shows that similar quantitative results are seen for samples with similar Zn/In ratios, and that the trends discussed in the paper are reproducible.

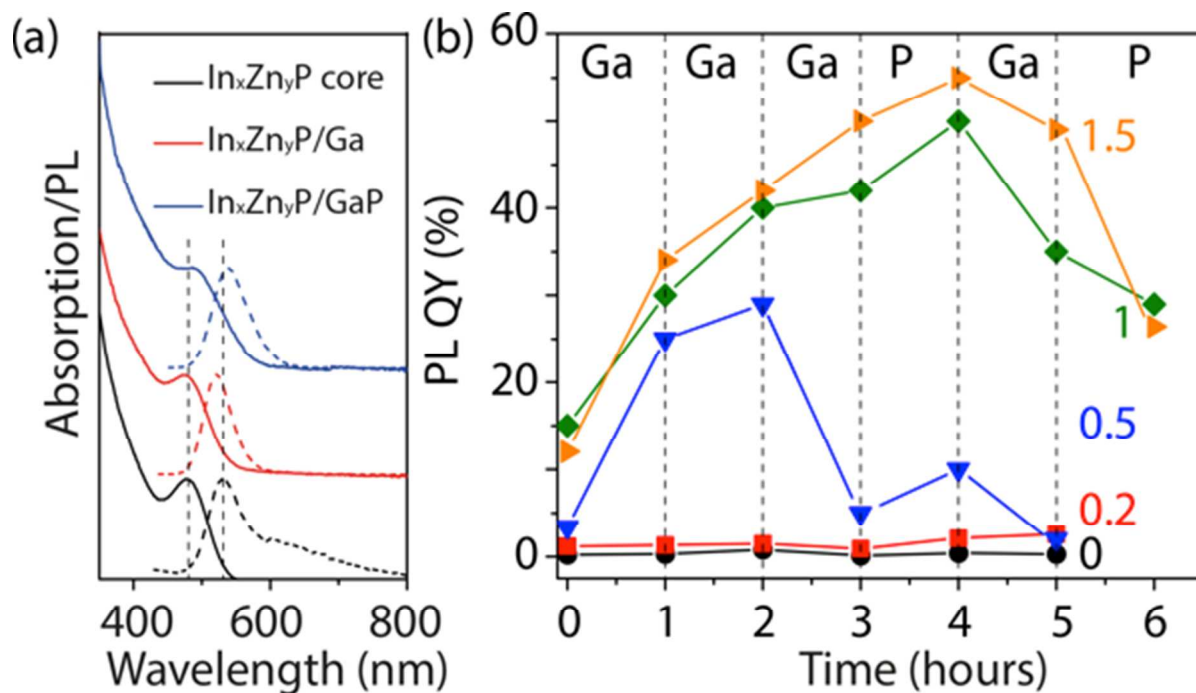

**Figure S5. (a)** Absorption and emission spectra of InZnP QDs ( $Zn/In = 1.5$ ) at different stages during the growth of the GaP shell (each Ga and P addition was 0.03 mmol). **(b)** Plot of the PL QY InZnP/InGaP/GaP core/shell QDs with different initial Zn/In ratios (0, black curve; 0.2, red curve; 0.5, blue curve; 1, green curve; and 1.5, orange curve), as function of the amount of Ga and P precursor added during the growth of the GaP shell.

## Extended data and characterisation of ZnSeS shell growth

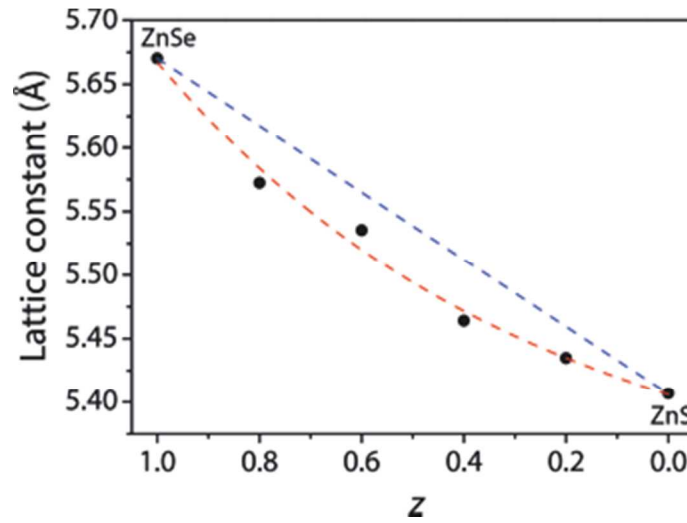

**Figure S6.** Plot of the lattice constant of the  $\text{ZnSe}_z\text{S}_{1-z}$  shell as function of the composition  $z$ , as reported in reference 1.<sup>1</sup> Ideally,  $z$  varies from ZnSe to ZnS linearly via Vegard's law<sup>2</sup> (blue dashed line), but the trend can deviate from linearity by a bowing parameter ( $b$ ),<sup>3,4</sup> according to equation (1):

$$y = (1 - z) * 5.406 + z * 5.670 - b * z * (1 - z) \quad (\text{eq. 1})$$

where 5.406 is the lattice constant of ZnS (Å)<sup>1</sup> and 5.670 is the lattice constant of ZnSe (Å).<sup>1</sup>

We fit the literature values (black dots) from reference 1 with equation (1) (red dashed curve), yielding a bowing parameter of 0.17 Å. This fit gives a direct correlation between the composition of the  $\text{ZnSe}_z\text{S}_{1-z}$  shell and its lattice constant. We used the literature values<sup>1</sup> (black dots) to construct a continuous relationship between  $z$  and the lattice constant of  $\text{ZnSe}_z\text{S}_{1-z}$  (red dashed curve) so that we can then extrapolate an  $a$  value for any given  $z$ .

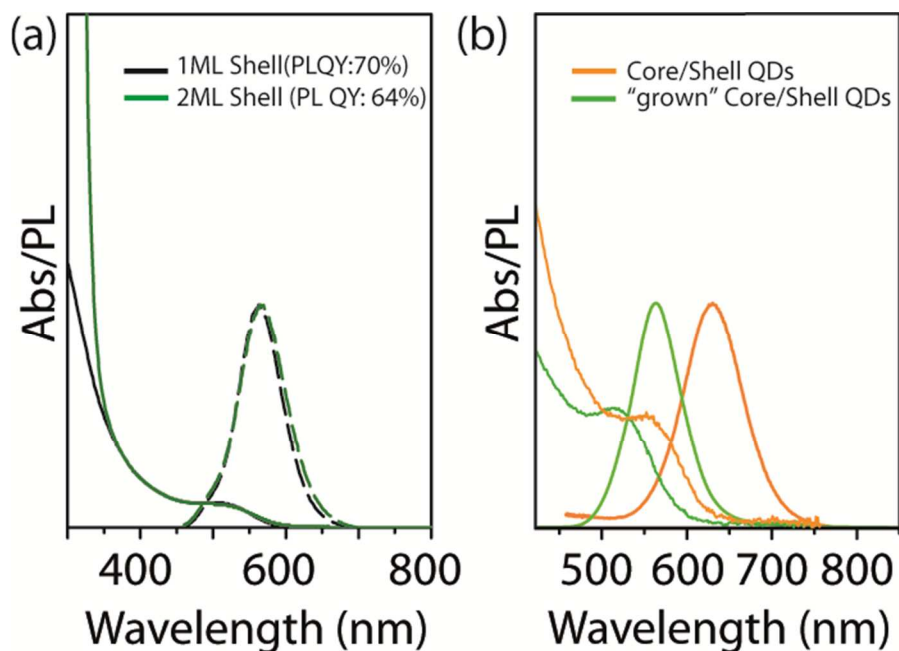

**Figure S7.** (a) Absorption and Emission spectra of  $\text{In}_x\text{Zn}_y\text{P}/\text{InGaP}/\text{GaP}/\text{ZnSe}_z\text{S}_{1-z}$  QDs with different shell thickness (1ML, black spectra and 2ML, green spectra). (b) Absorbance and emission spectra of  $\text{InZnP}/\text{InGaP}/\text{GaP}/\text{ZnSe}_z\text{S}_{1-z}$  QDs emitting at 565 nm (green curve) and 627 nm (orange curve).

## REFERENCES

- (1) Sadekar, H. K.; Ghule, A. V.; Sharma, R. *J. Alloys Compd.* **2011**, *509* (18), 5525–5531.
- (2) Denton, A.; Ashcroft, N. *Phys. Rev. A* **1991**, *43* (6), 3161–3164.
- (3) Kats, A. *Indium Phosphide Relat. Mater. Process. Technol. Devices* **1992**, Artech Hou.
- (4) Kuo, Y.-K.; Liou, B.-T.; Yen, S.-H.; Chu, H.-Y. *Opt. Commun.* **2004**, *237* (4-6), 363–369.
